# Supplementary material for: Multiscale Modeling of Metabolism and Macromolecular Synthesis in E. coli and Its Application to the Evolution of Codon Usage
Source: PubMed Central journal article supplement (PMC3461016; doi:10.1371/journal.pone.0045635), 2012-09-28
Supplement: pone.0045635.s007.pdf [file pone.0045635.s007.pdf]

## Supplementary Table S1

Summary of genomes included in the gene conservation analysis. Part I. Open Reading Frames (ORFs).

|    | NAME                                       | ORFs | genes mapped (in %) |
|----|--------------------------------------------|------|---------------------|
| N. | ENTEROBACTERS                              |      |                     |
| 1  | 0127 H6 E2348 69                           | 4653 | 54                  |
| 2  | 536                                        | 4620 | 55                  |
| 3  | APEC O1                                    | 4851 | 51                  |
| 4  | Buchnera aphidicola                        | 507  | 92                  |
| 5  | Buchnera aphidicola 5A Acyrthosiphon pisum | 555  | 93                  |
| 6  | Buchnera aphidicola Cc Cinara cedri        | 357  | 86                  |
| 7  | Buchnera aphidicola Sg                     | 546  | 92                  |
| 8  | Buchnera aphidicola Tuc7                   | 553  | 93                  |
| 9  | Buchnera sp                                | 574  | 92                  |
| 10 | Candidatus Blochmannia floridanus          | 583  | 92                  |
| 11 | Candidatus Blochmannia pennsylvanicus BPEN | 610  | 92                  |
| 12 | CFT073                                     | 5339 | 48                  |
| 13 | Citrobacter koseri ATCC BAA-895            | 5008 | 47                  |
| 14 | C ATCC 8739 NC                             | 4200 | 64                  |
| 15 | E24377A                                    | 4991 | 53                  |
| 16 | Enterobacter sakazakii ATCC BAA-894        | 4420 | 48                  |
| 17 | Erwinia carotovora atroseptica SCRI1043    | 4472 | 45                  |
| 18 | Erwinia tasmaniensis                       | 3622 | 50                  |
| 19 | HS                                         | 4378 | 60                  |
| 20 | Klebsiella pneumoniae 342                  | 5768 | 40                  |
| 21 | Klebsiella pneumoniae MGH 78578            | 5187 | 45                  |
| 22 | K 12 substr DH10B                          | 4126 | 65                  |
| 23 | O157H7 EDL933                              | 5411 | 48                  |
| 24 | O157H7 NC 002128 all                       | 5318 | 49                  |
| 25 | O157 H7 EC4115                             | 5477 | 47                  |
| 26 | Paratyphi A AKU 12601                      | 4078 | 56                  |
| 27 | Paratyphi B SPB7                           | 5592 | 42                  |
| 28 | Photobacterium luminescens                 | 4683 | 37                  |
| 29 | Proteus mirabilis NC                       | 3662 | 49                  |
| 30 | Salmonella Agona SL483 faa                 | 4614 | 50                  |
| 31 | Salmonella Enteritidis P125109             | 4206 | 56                  |
| 32 | Salmonella Gallinarum 287 91               | 3965 | 58                  |
| 33 | Salmonella Heidelberg SL476                | 4779 | 49                  |
| 34 | Salmonella Newport SL254                   | 4805 | 49                  |
| 35 | Salmonella typhimurium LT2                 | 4525 | 52                  |
| 36 | Salmonella typhi NC                        | 4758 | 48                  |
| 37 | Salmonella Typhi Ty2                       | 4318 | 53                  |
| 38 | Schwarzengrund CVM19633                    | 4627 | 50                  |
| 39 | SE11                                       | 5002 | 53                  |
| 40 | Serratia proteamaculans 568                | 4942 | 45                  |
| 41 | Shigella boydii CDC 3083 94                | 4557 | 50                  |
| 42 | Shigella boydii Sb227                      | 4283 | 58                  |

**Summary of genomes included in the gene conservation analysis. Part II**

|                          | NAME                                                             | ORFs | genes mapped (in %) |
|--------------------------|------------------------------------------------------------------|------|---------------------|
| 43                       | <i>Shigella dysenteriae</i>                                      | 4503 | 48                  |
| 44                       | <i>Shigella flexneri</i> 2a 2457T                                | 4061 | 60                  |
| 45                       | <i>Shigella flexneri</i> 2a NC 004337                            | 4440 | 54                  |
| 46                       | <i>Shigella flexneri</i> 5 8401                                  | 4115 | 60                  |
| 47                       | <i>Shigella sonnei</i> Ss046                                     | 4471 | 59                  |
| 48                       | SMS 3 5                                                          | 4913 | 54                  |
| 49                       | <i>Sodalis glossinidius morsitans</i>                            | 2516 | 55                  |
| 50                       | UTI89 vs eco 2 query.ko                                          | 5021 | 51                  |
| 51                       | W3110                                                            | 4226 | 65                  |
| 52                       | <i>Wigglesworthia brevialpispis</i>                              | 617  | 90                  |
| 53                       | <i>Yersinia enterocolitica</i> 8081                              | 4051 | 51                  |
| 54                       | <i>Yersinia pestis</i> Angola                                    | 4040 | 46                  |
| 55                       | <i>Yersinia pestis</i> Antiqua                                   | 4364 | 45                  |
| 56                       | <i>Yersinia pestis</i> biovar <i>Microtus</i> 91001              | 4138 | 47                  |
| 57                       | <i>Yersinia pestis</i> CO92                                      | 4066 | 47                  |
| 58                       | <i>Yersinia pestis</i> KIM                                       | 4202 | 46                  |
| 59                       | <i>Yersinia pestis</i> Nepal516                                  | 4094 | 48                  |
| 60                       | <i>Yersinia pestis</i> Pestoides F                               | 4069 | 48                  |
| 61                       | <i>Yersinia pseudotuberculosis</i> IP32953                       | 4038 | 49                  |
| 62                       | <i>Yersinia pseudotuberculosis</i> IP 31758                      | 4324 | 46                  |
| 63                       | <i>Yersinia pseudotuberculosis</i> PB1                           | 4237 | 47                  |
| 64                       | <i>Yersinia pseudotuberculosis</i> YPIII                         | 4192 | 47                  |
| 65                       | <i>Yersinia pseudotuberculosis</i> IP32953 ' ,                   | 4038 | 49                  |
| <b>NON-ENTEROBACTERS</b> |                                                                  |      |                     |
| 66                       | <i>Acinetobacter baumannii</i> AYE NC 010410 all                 | 3712 | 36                  |
| 67                       | <i>Acinetobacter</i> sp ADP1 NC 005966                           | 3307 | 40                  |
| 68                       | <i>Bacillus subtilis</i> NC 000964                               | 4105 | 32                  |
| 69                       | <i>Clostridium beijerinckii</i> NCIMB 8052 NC 009617             | 5020 | 23                  |
| 70                       | <i>Clostridium botulinum</i> E3 Alaska E43 NC 010723             | 3256 | 26                  |
| 71                       | <i>Clostridium thermocellum</i> ATCC 27405 NC 009012             | 3189 | 24                  |
| 72                       | <i>Corynebacterium glutamicum</i> ATCC 13032 Bielefeld NC 006958 | 3057 | 27                  |
| 73                       | <i>Corynebacterium glutamicum</i> ATCC 13032 Kitasato NC 003450  | 2993 | 33                  |
| 74                       | <i>Geobacillus thermodenitrificans</i> NG80-2 NC 009328 all      | 3445 | 29                  |
| 75                       | <i>Geobacter lovleyi</i> SZ NC 010814 all                        | 3685 | 27                  |
| 76                       | <i>Geobacter uraniumreducens</i> Rf4 NC 009483                   | 4357 | 24                  |
| 77                       | <i>Haemophilus influenzae</i> 86 028NP NC 007146                 | 1792 | 62                  |
| 78                       | <i>Haemophilus influenzae</i> NC 000907                          | 1657 | 68                  |
| 79                       | <i>Helicobacter pylori</i> G27 NC 011333 all                     | 1504 | 37                  |
| 80                       | <i>Helicobacter pylori</i> HPAG1 NC 008086 all                   | 1544 | 38                  |
| 81                       | <i>Lactobacillus acidophilus</i> NCFM NC 006814                  | 1862 | 31                  |
| 82                       | <i>Lactobacillus delbrueckii bulgaricus</i> NC 008054            | 1562 | 33                  |
| 83                       | <i>Lactococcus lactis cremoris</i> MG1363 NC 009004              | 2434 | 30                  |
| 84                       | <i>Lactococcus lactis cremoris</i> SK11 NC 008527 all            | 2504 | 28                  |
| 85                       | <i>Mannheimia succiniciproducens</i> MBEL55E NC 006300           | 2369 | 55                  |
| 86                       | <i>Mycobacterium tuberculosis</i> H37Ra NC 009525                | 4034 | 20                  |

**Summary of genomes included in the gene conservation analysis. Part III**

|     | NAME                                                               | ORFs | genes mapped (in %) |
|-----|--------------------------------------------------------------------|------|---------------------|
| 87  | <i>Mycoplasma agalactiae</i> PG2 NC 009497                         | 742  | 32                  |
| 88  | <i>Mycoplasma capricolum</i> ATCC 27343 NC 007633                  | 812  | 33                  |
| 89  | <i>Nautilia profundicola</i> AmH NC 012115                         | 1730 | 39                  |
| 90  | <i>Neisseria gonorrhoeae</i> FA 1090 NC 002946                     | 2002 | 43                  |
| 91  | <i>Neisseria meningitidis</i> 053442 NC 010120                     | 2020 | 44                  |
| 92  | <i>Porphyromonas gingivalis</i> ATCC 33277 NC 010729               | 2090 | 30                  |
| 93  | <i>Pseudomonas aeruginosa</i> PA7 NC 009656                        | 6286 | 26                  |
| 94  | <i>Pseudomonas fluorescens</i> Pf-5 NC 004129                      | 6138 | 27                  |
| 95  | <i>Pseudomonas mendocina</i> ymp NC 009439                         | 4594 | 32                  |
| 96  | <i>Pseudomonas putida</i> GB 1 NC 010322                           | 5409 | 30                  |
| 97  | <i>Pseudomonas stutzeri</i> A1501 NC 009434                        | 4128 | 35                  |
| 98  | <i>Rhizobium etli</i> CFN 42 NC 007766 all                         | 5963 | 21                  |
| 99  | <i>Rhizobium leguminosarum</i> bv <i>viciae</i> 3841 NC 008384 all | 7143 | 19                  |
| 100 | <i>Staphylococcus aureus</i> Newman NC 009641                      | 2614 | 31                  |
| 101 | <i>Staphylothermus marinus</i> F1 NC 009033                        | 1570 | 15                  |
| 102 | <i>Streptomyces griseus</i> NBRC 13350 NC 010572                   | 7136 | 15                  |
| 103 | <i>Synechococcus</i> PCC 7002 NC 010480 all                        | 3186 | 25                  |
| 104 | <i>Thermotoga petrophila</i> RKU-1 NC 009486                       | 1785 | 37                  |
| 105 | <i>Thermotoga</i> RQ2 NC 011978                                    | 1937 | 35                  |
