# Supplementary material for: Multiscale Modeling of Metabolism and Macromolecular Synthesis in E. coli and Its Application to the Evolution of Codon Usage
Source: PubMed Central journal article supplement (PMC3461016; doi:10.1371/journal.pone.0045635), 2012-09-28
Supplement: pone.0045635.s008.pdf [file pone.0045635.s008.pdf]

## Supplementary Table S2

## Codons recognition by tRNA in the ME-matrix. Part I.

|                              | generic tRNA | codon | Amino acid |
|------------------------------|--------------|-------|------------|
| alaT, alaU, alaV             | ala1-tRNA    | gct   | ala-L      |
| alaT, alaU, alaV             | ala1-tRNA    | gca   | ala-L      |
| alaT, alaU, alaV             | ala1-tRNA    | gcg   | ala-L      |
| alaW, alaX                   | ala2-tRNA    | gcc   | ala-L      |
| argQ, argV, argY, argZ       | arg1-tRNA    | cgt   | arg-L      |
| argQ, argV, argY, argZ       | arg1-tRNA    | cgc   | arg-L      |
| argQ, argV, argY, argZ       | arg1-tRNA    | cga   | arg-L      |
|                              | argU-tRNA    | aga   | arg-L      |
|                              | argW-tRNA    | agg   | arg-L      |
|                              | argX-tRNA    | cgg   | arg-L      |
| asnT, asnU, asnV, ansW       | asn1-tRNA    | aac   | asn-L      |
| asnT, asnU, asnV, ansW       | asn1-tRNA    | aat   | asn-L      |
| aspT, aspU, aspV             | asp1-tRNA    | gac   | asp-L      |
| aspT, aspU, aspV             | asp1-tRNA    | gat   | asp-L      |
|                              | cysT-tRNA    | tgc   | cys-L      |
|                              | cysT-tRNA    | tgt   | cys-L      |
| glnU, glnW                   | gln1-tRNA    | cag   | gln-L      |
| glnV, glnX                   | gln2-tRNA    | caa   | gln-L      |
| gltT, gltU, gltV, gltW       | glu1-tRNA    | gaa   | glu-L      |
| gltT, gltU, gltV, gltW       | glu1-tRNA    | gag   | glu-L      |
| glyV, glyW, glyX, glyY       | gly1-tRNA    | ggc   | gly        |
| glyV, glyW, glyX, glyY       | gly1-tRNA    | ggt   | gly        |
|                              | glyT-tRNA    | gga   | gly        |
|                              | glyU-tRNA    | ggg   | gly        |
|                              | hisR-tRNA    | cac   | his-L      |
|                              | hisR-tRNA    | cat   | his-L      |
| ileT, ileU, ileV             | ile1-tRNA    | atc   | ile-L      |
| ileT, ileU, ileV             | ile1-tRNA    | att   | ile-L      |
| ileX, ileY                   | ile2-tRNA    | ata   | ile-L      |
| leuP, leuQ, leuT, leuV, leuW | leu1-tRNA    | ctg   | leu-L      |
|                              | leuU-tRNA    | ctc   | leu-L      |

## Codons recognition by tRNA in the ME-matrix. Part II.

|                                    | generic tRNA | codon | Amino acid |
|------------------------------------|--------------|-------|------------|
|                                    | leuU-tRNA    | ctt   | leu-L      |
|                                    | leuW-tRNA    | cta   | leu-L      |
| leuX, leuZ                         | leu2-tRNA    | ttg   | leu-L      |
|                                    | leuZ-tRNA    | tta   | leu-L      |
| lysQ, lysT, lysV, lysW, lysY, lysZ | lys1-tRNA    | aaa   | lys-L      |
| lysQ, lysT, lysV, lysW, lysY, lysZ | lys1-tRNA    | aag   | lys-L      |
| metT, metU                         | met1-tRNA    | atg   | met-L      |
| pheU, pheV                         | phe1-tRNA    | ttc   | phe-L      |
| pheU, pheV                         | phe1-tRNA    | ttt   | phe-L      |
| proK, proM                         | pro1-tRNA    | ccg   | pro-L      |
|                                    | proL-tRNA    | ccc   | pro-L      |
| proL, proM                         | pro2-tRNA    | cct   | pro-L      |
|                                    | proM-tRNA    | cca   | pro-L      |
| serW, serX                         | ser1-tRNA    | tcc   | ser-L      |
| serT, serW, serX                   | ser2-tRNA    | tct   | ser-L      |
|                                    | serT-tRNA    | tca   | ser-L      |
| serT, serU                         | ser3-tRNA    | tcg   | ser-L      |
|                                    | serV-tRNA    | agc   | ser-L      |
|                                    | serV-tRNA    | agt   | ser-L      |
| thrT, thrV                         | thr1-tRNA    | acc   | thr-L      |
| thrT, thrU, thrV                   | thr2-tRNA    | act   | thr-L      |
|                                    | thrU-tRNA    | aca   | thr-L      |
| thrU, thrW                         | thr3-tRNA    | acg   | thr-L      |
|                                    | trpT-tRNA    | tgg   | trp-L      |
| tyrT, tyrU, tyrV                   | tyr1-tRNA    | tac   | tyr-L      |
| tyrT, tyrU, tyrV                   | tyr1-tRNA    | tat   | tyr-L      |
| valT, valU, valX, valY, valZ       | val1-tRNA    | gta   | val-L      |
| valT, valU, valX, valY, valZ       | val1-tRNA    | gtg   | val-L      |
| valV, valW                         | val2-tRNA    | gtc   | val-L      |
| valT, valU, valW, valX, valY, valZ | val3-tRNA    | gtt   | val-L      |
| metV, metW, metY, metZ             | fmet-tRNA    | atg   | start      |
